# Supplementary material
Source: MDPI journal article supplement (https://www.mdpi.com/2073-4441/6/10/3012)
Supplement: s1 [file s1]

Supplementary Information

**Figure S1.** “Breaks for additive seasonal and trend” (BFAST) test for monthly streamflow and sediment load at Tangnaihai station. (**a**) Monthly streamflow at Tangnaihai station;
(**b**) Monthly Sediment load at Tangnaihai station.

| 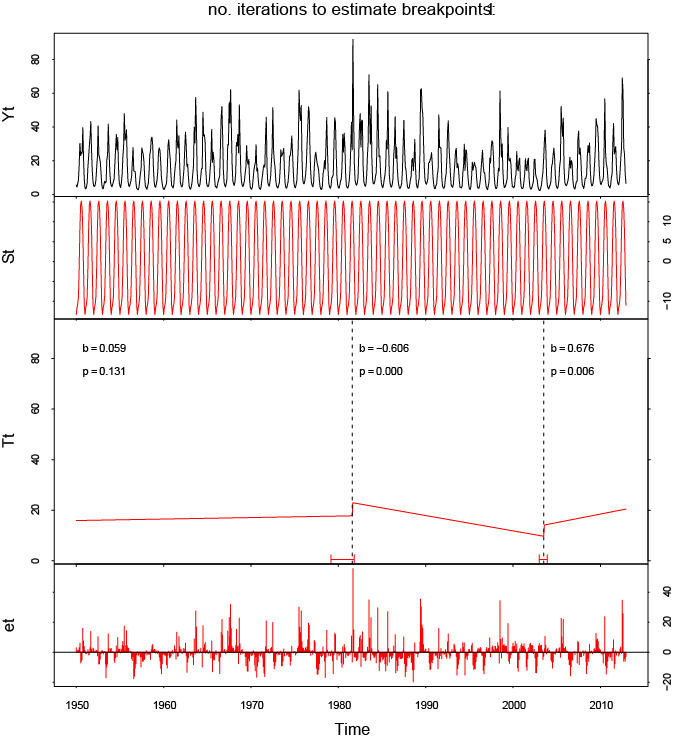 |
| --- |
| (**a**) |
| 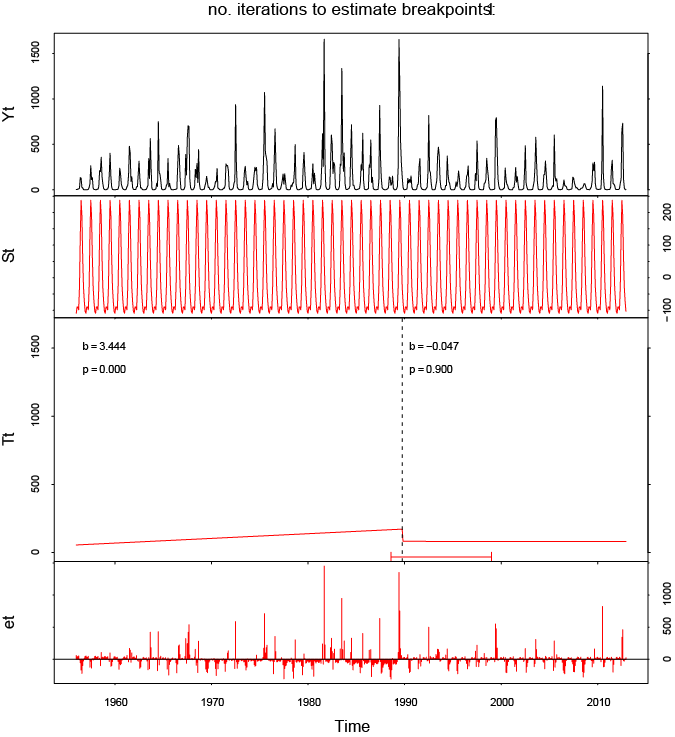 |
| (**b**) |

**Figure S2.** Sequential *t*-test analysis of the regime shifts (STARS) test for annual streamflow and sediment load at Tangnaihai station. (**a**) Annual streamflow at Tangnaihai station; (**b**) Annual sediment load at Tangnaihai station.

| 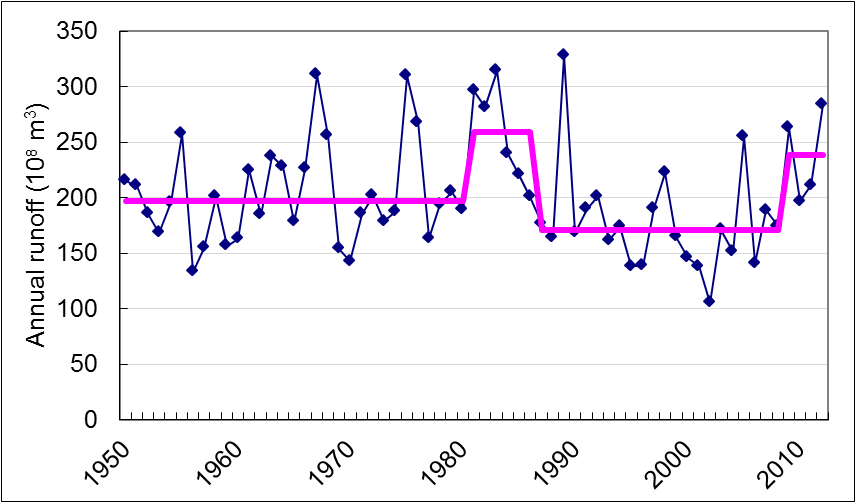 |
| --- |
| (**a**) |
| 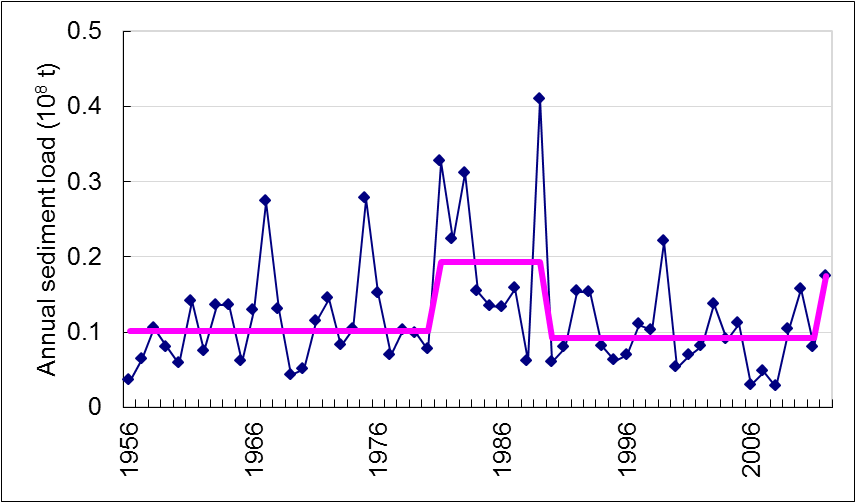 |
| (**b**) |

**Figure S3.** BFAST test for monthly streamflow and sediment load at Longmen station.
(**a**) Monthly streamflow at Longmen station; (**b**) Monthly Sediment load at Longmen station.


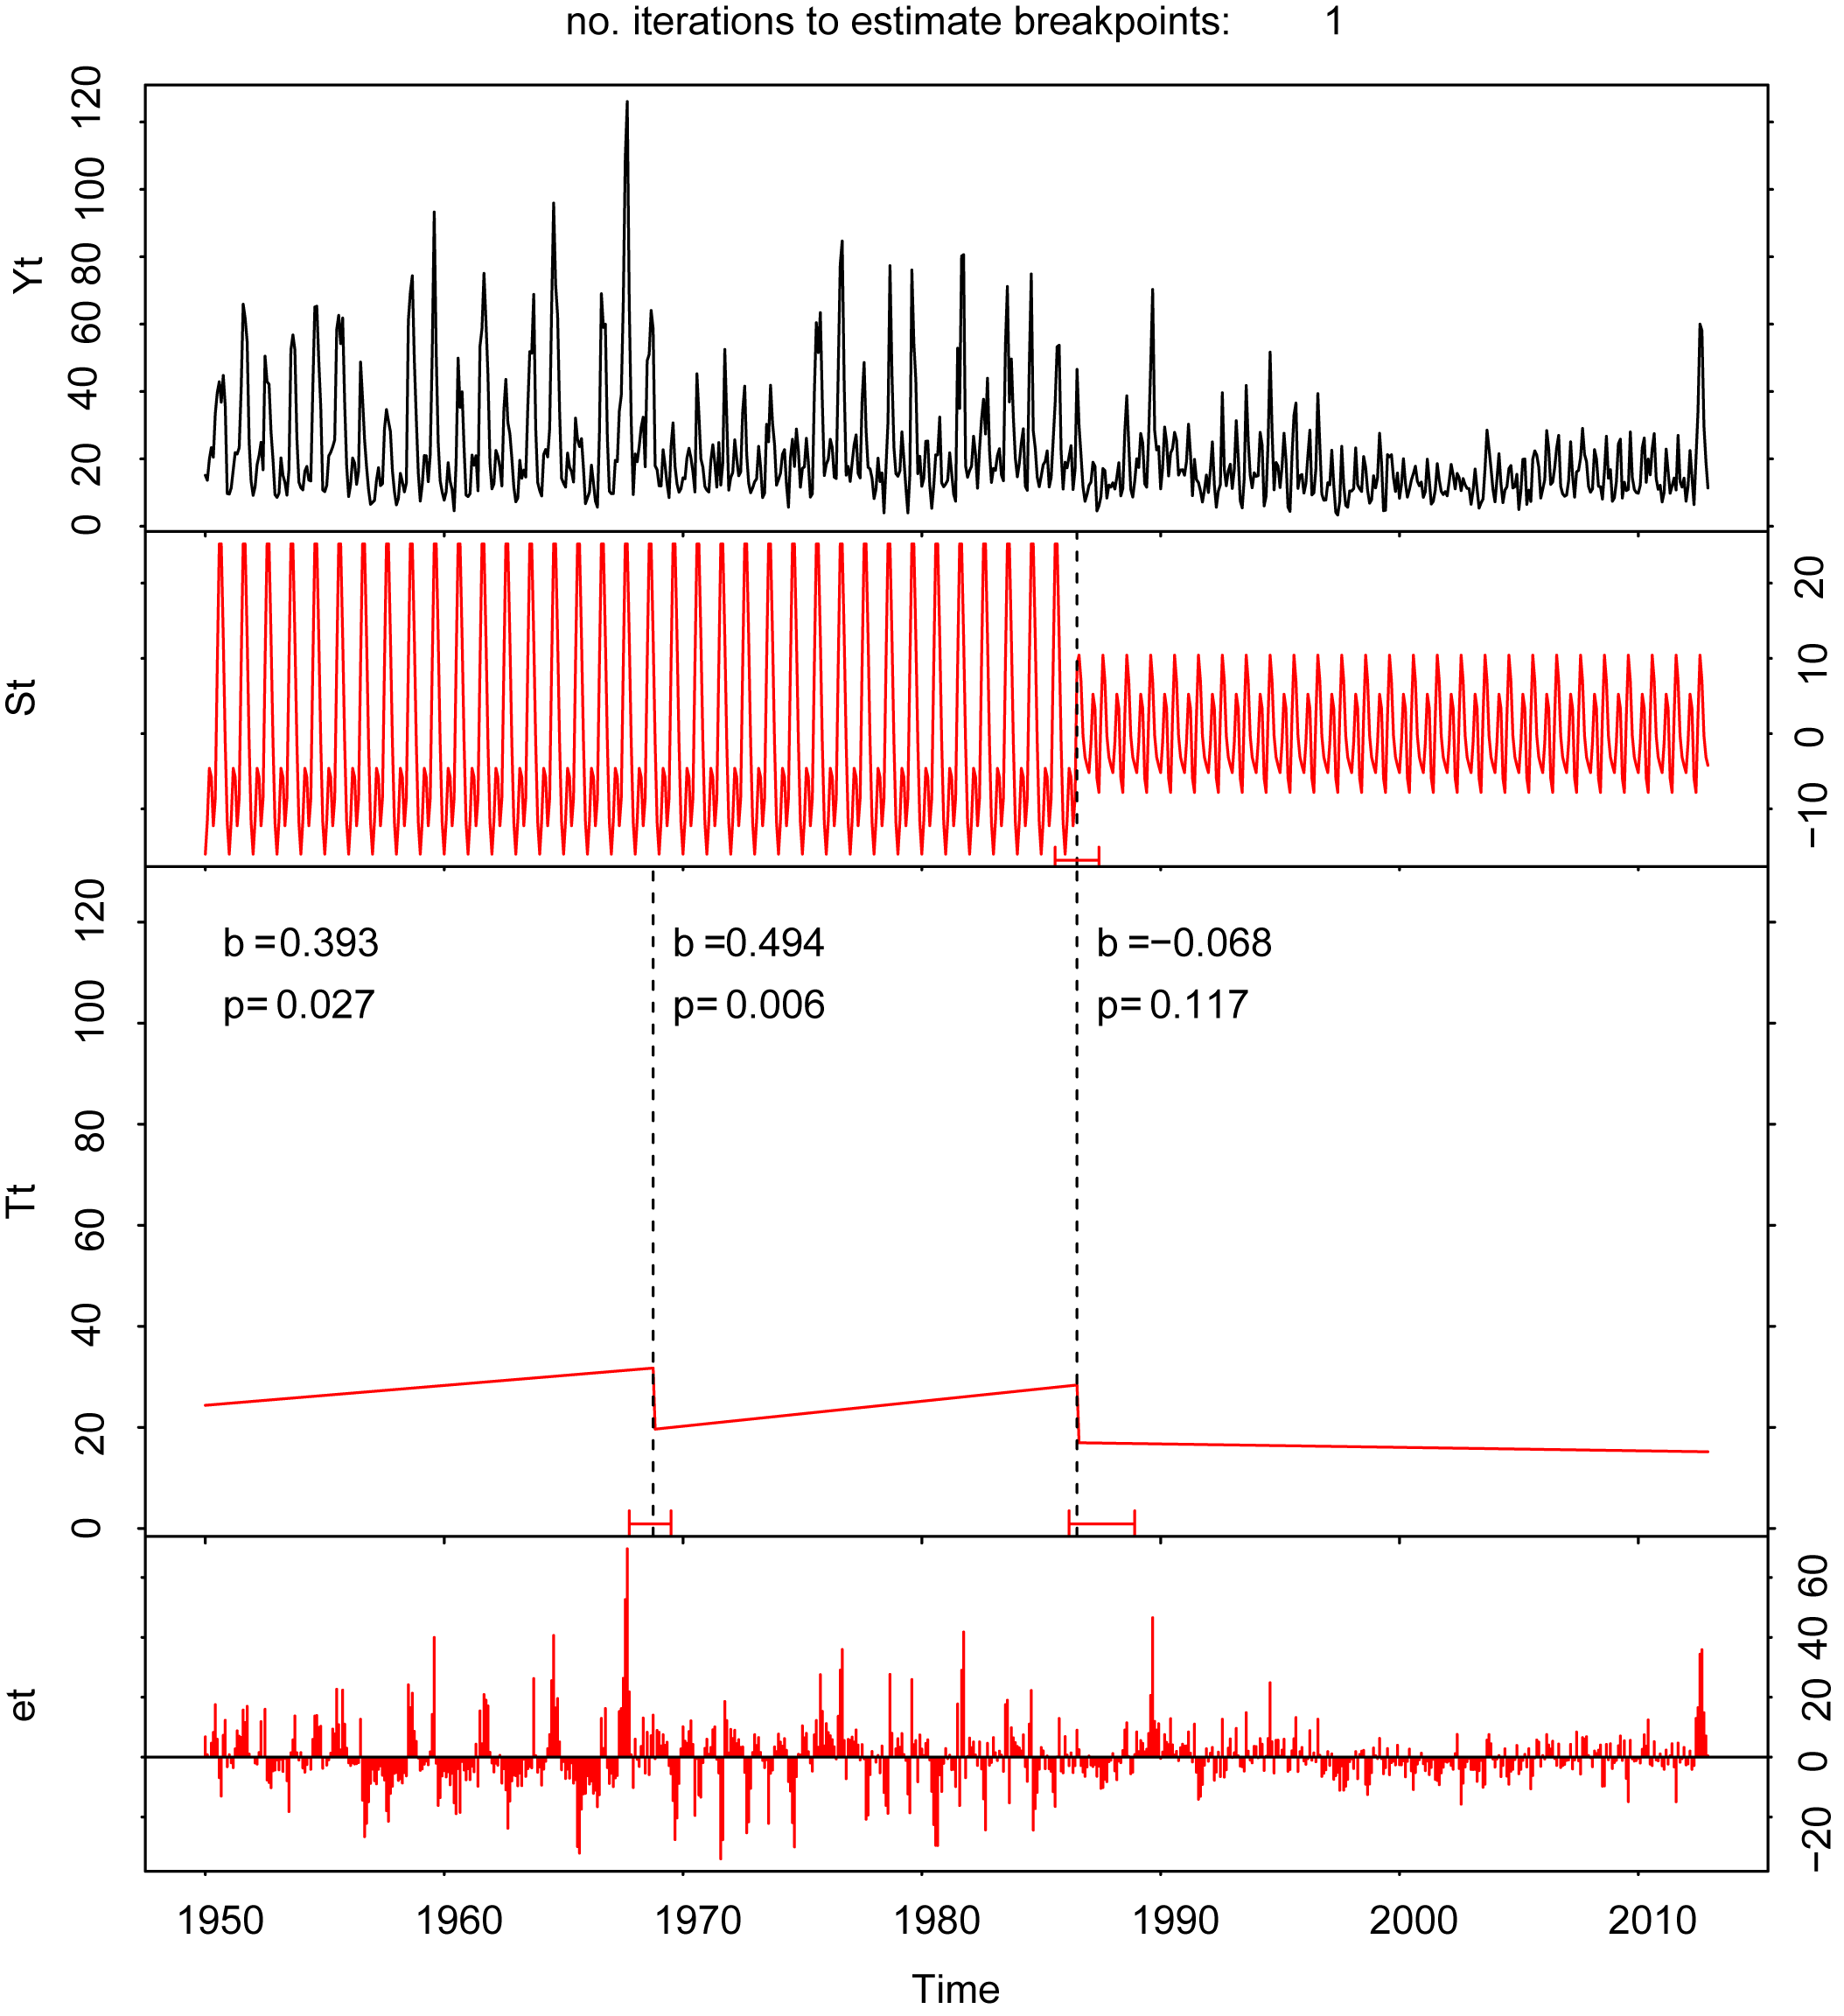


(**a**)

**Figure S3.** *Cont.*


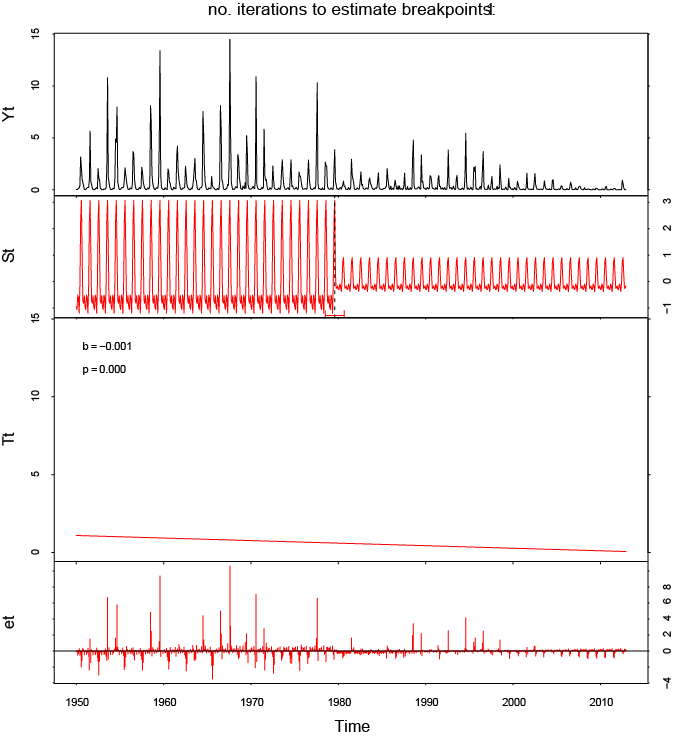


(**b**)

**Figure S4.** STARS test for annual streamflow and sediment load at Longmen station.
(**a**) Annual streamflow at Longmen station; (**b**) Annual sediment load at Longmen station.

(**a**)

(**b**)

**Figure S5.** BFAST test for monthly streamflow and sediment load at Tongguan station.
(**a**) Monthly streamflow at Tongguan station; (**b**) Monthly Sediment load at Tongguan station.


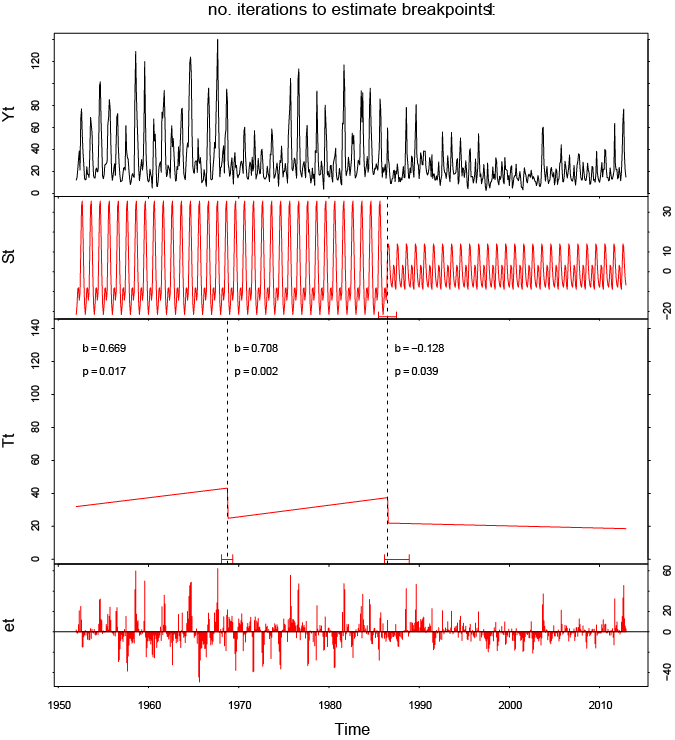


(**a**)


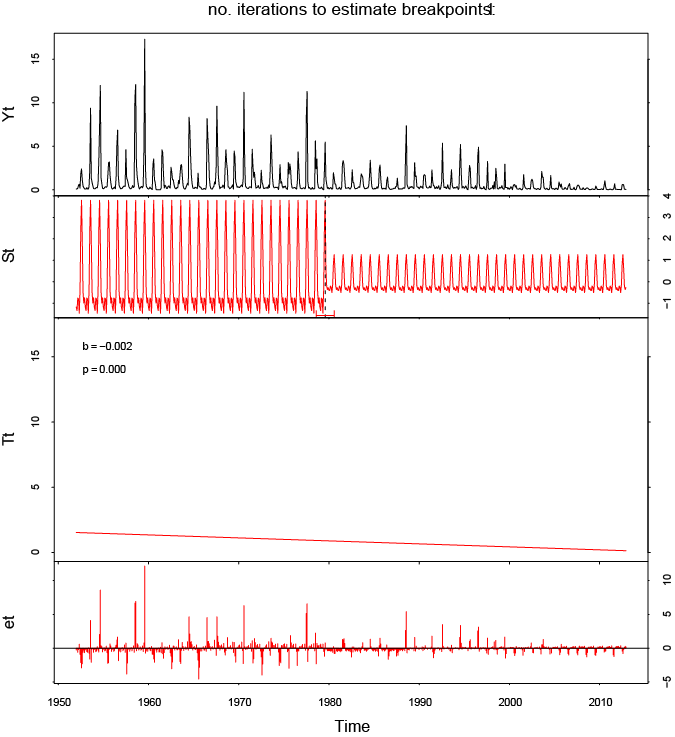


(**b**)

**Figure S6.** STARS test for annual streamflow and sediment load at Tongguan station.
(**a**) Annual streamflow at Tongguan station; (**b**) Annual sediment load at Tongguan station.

(**a**)

(**b**)

**Figure S7.** BFAST test for monthly streamflow and sediment load at Huayuankou
station. (**a**) Monthly streamflow at Huayuankou station; (**b**) Monthly Sediment load at Huayuankou station.


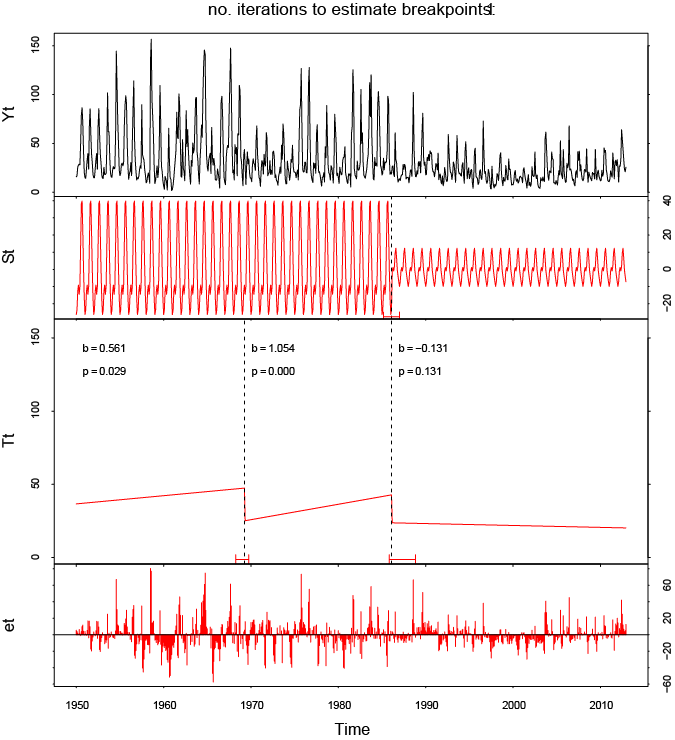


(**a**)

**Figure S7.** *Cont.*


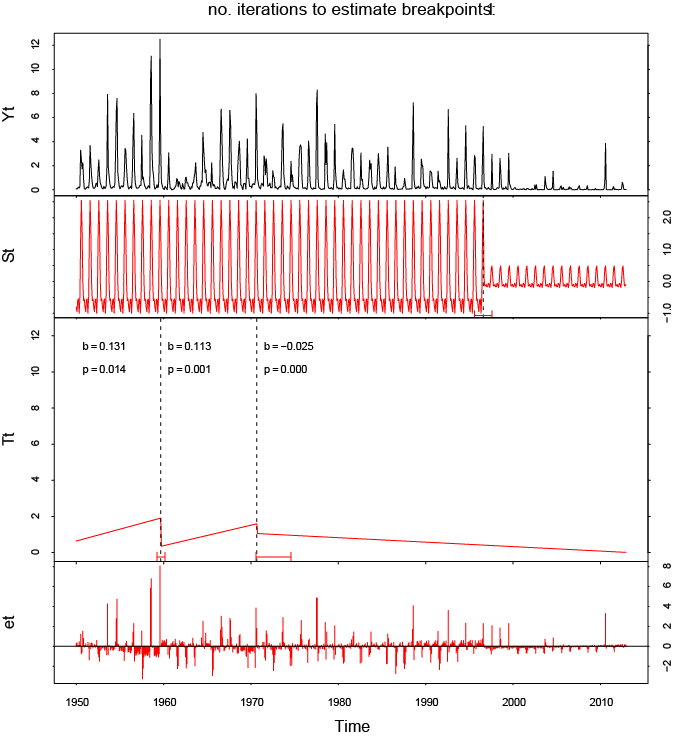


(**b**)

**Figure S8.** STARS test for annual streamflow and sediment load at Huayuankou station.
(**a**) Annual runoff at Huayuankou station; (**b**) Annual sediment load at Huayuankou station.

(**a**)

(**b**)

**Figure S9.** BFAST test for monthly streamflow and sediment load at Gaocun station.
(**a**) Monthly streamflow at Gaocun station; (**b**) Monthly Sediment load at Gaocun station.


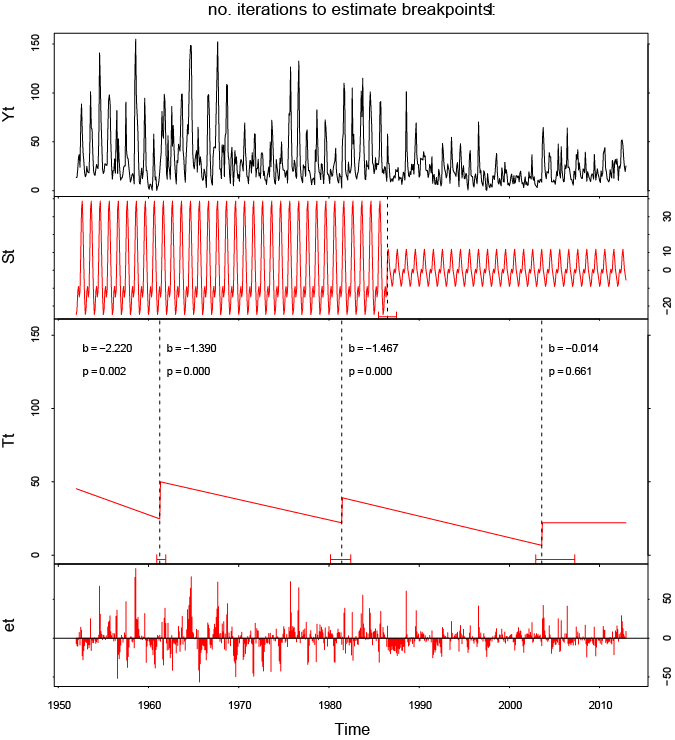


(**a**)


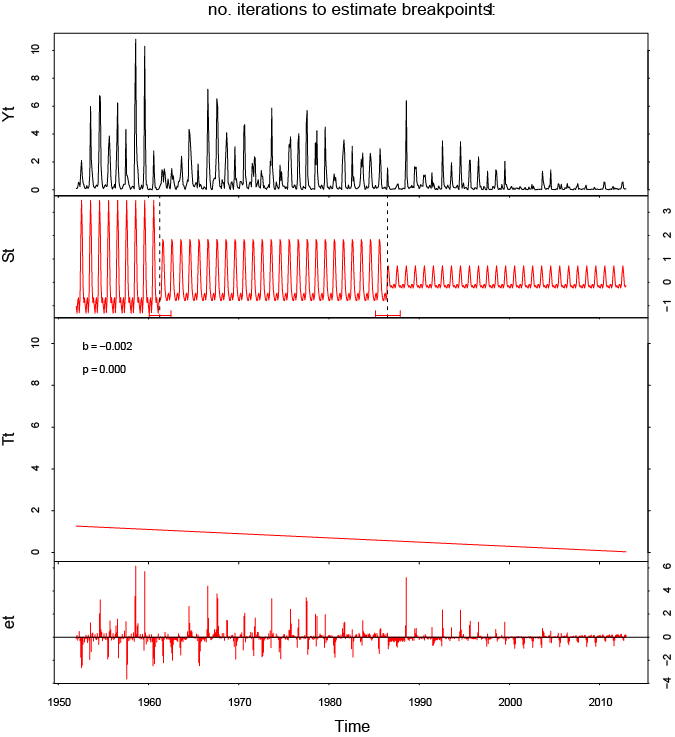


(**b**)

**Figure S10.** STARS test for annual streamflow and sediment load at Gaocun station.
(**a**) Annual runoff at Gaocun station; (**b**) Annual sediment load at Gaocun station.

(**a**)

(**b**)

© 2014 by the authors; licensee MDPI, Basel, Switzerland. This article is an open access article distributed under the terms and conditions of the Creative Commons Attribution license (http://creativecommons.org/licenses/by/4.0/).
